# Supplementary material for: Composite silica coated gold nanosphere and quantum dots nanoparticles for X-ray CT and fluorescence bimodal imaging
Source: Royal Society of Chemistry journal article supplement (doi:10.1039/c5dt01286d), 2015-01-01
Supplement: c5dt01286d1.pdf [file c5dt01286d1.pdf]

## Supporting Information

**Composite silica coated gold nanosphere and quantum dots nanoparticle for**

**X-ray CT and fluorescence bimodal imaging**

Ji-Tao Song<sup>‡</sup>, Xiao-Quan Yang<sup>‡</sup>, Xiao-Shuai Zhang, Dong-Mei Yan, Ming-Hao Yao,

Meng-Yao Qin and Yuan-Di Zhao\*

---

Britton Chance Center for Biomedical Photonics at Wuhan National Laboratory for Optoelectronics - Hubei Bioinformatics & Molecular Imaging Key Laboratory, Department of Biomedical Engineering, College of Life Science and Technology, Huazhong University of Science and Technology, Wuhan 430074, P. R. China

\* Corresponding author. Tel./Fax: +86 27-8779-2202.

Email address: zydi@mail.hust.edu.cn (Y.D. Zhao)

<sup>‡</sup>These authors equally contributed to this article.

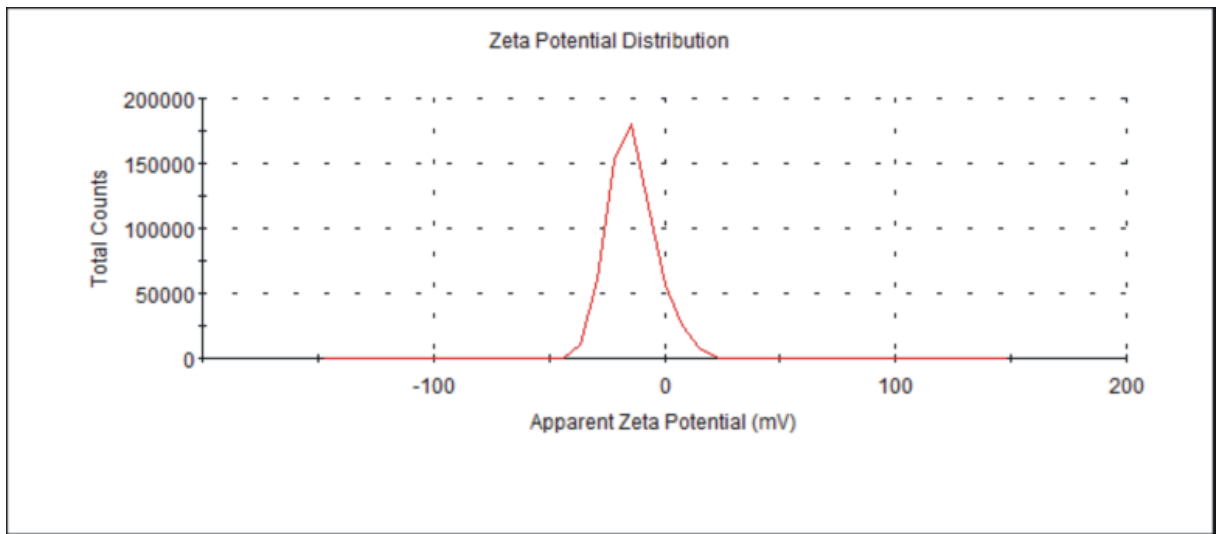

**Fig. S1** Zeta-potential distribution of QD-AP (-13.8 mV)

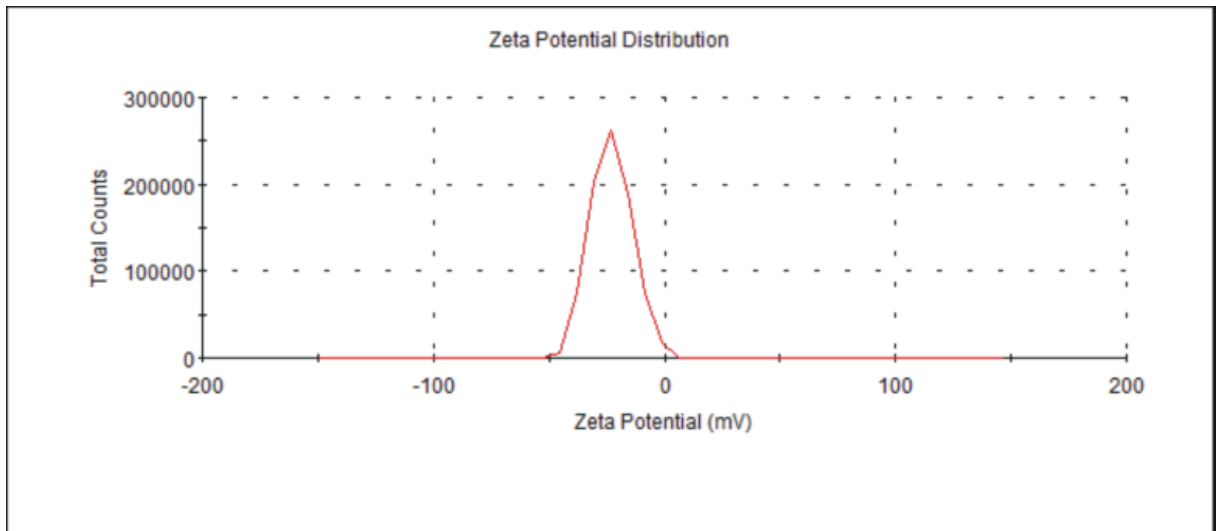

**Fig. S2** Zeta-potential distribution of Au@SiO<sub>2</sub> (-23 mV)

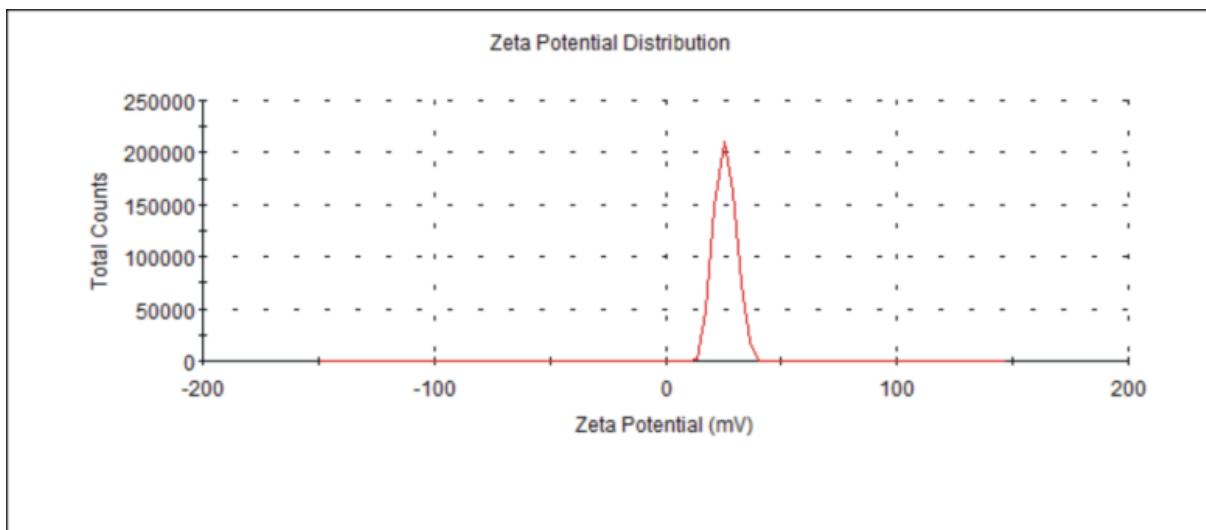

**Fig. S3** Zeta-potential distribution of Au@SiO<sub>2</sub>-NH<sub>2</sub> (+26 mV)

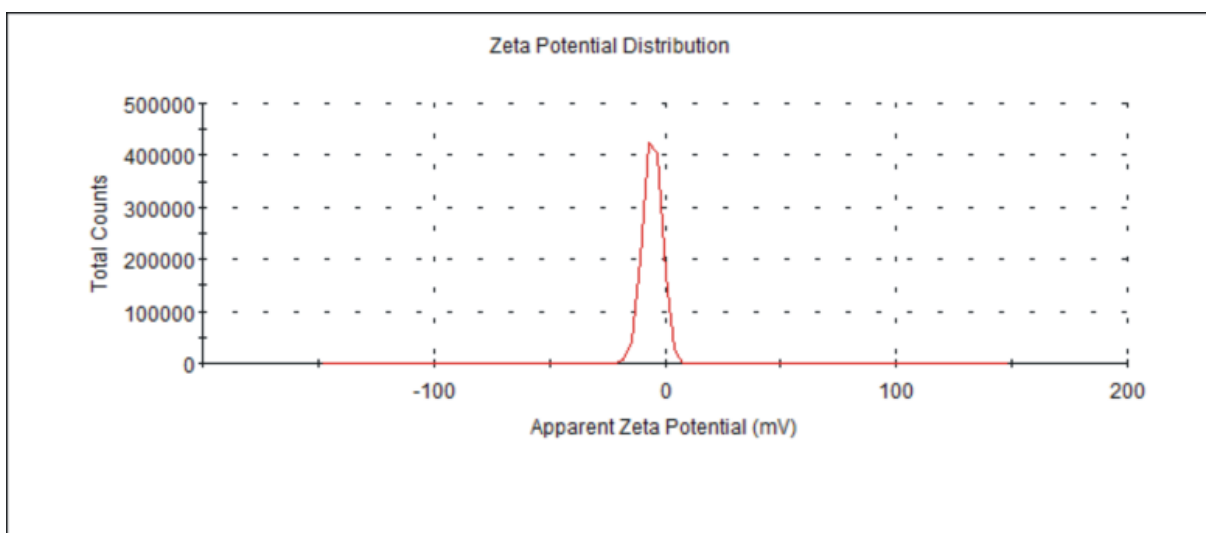

**Fig. S4** Zeta-potential distribution of Au@SiO<sub>2</sub>-QDs (-5.4 mV)

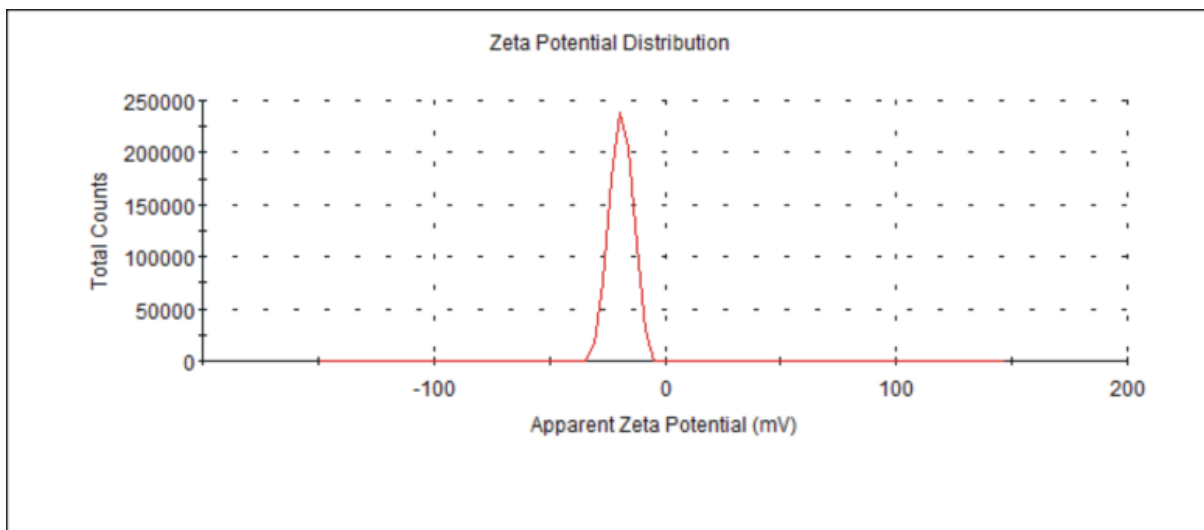

**Fig. S5** Zeta-potential distribution of Au@SiO<sub>2</sub>-QDs/SiO<sub>2</sub> (-20 mV)

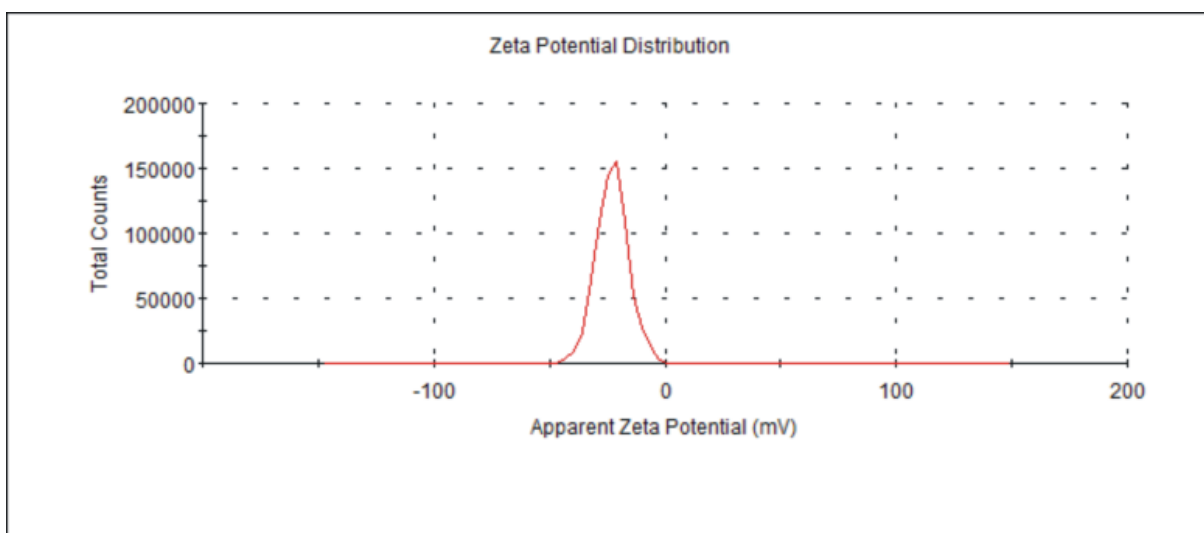

**Fig. S6** Zeta-potential distribution of Au@SiO<sub>2</sub>-QDs/SiO<sub>2</sub>-PVP (-22 mV)

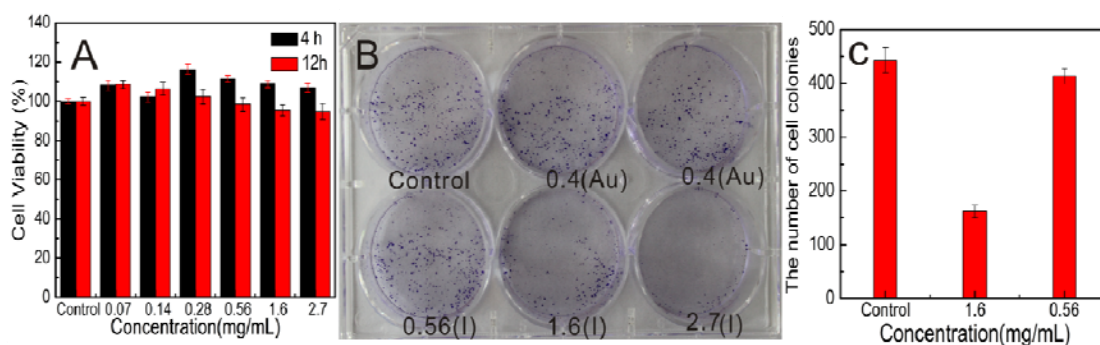

**Fig. S7** (A) CCK-8 test toxicity of compound meglumine diatrizoate injection to RAW 264.7 cells incubated with different concentrations (0.0-2.7mg/mL) of probe for 4 hours and 12 hours at 37 °C in the dark respectively. (B) Cell colonies formation after 10 days with different concentrations (0.56, 1.6 and 2.7 mg/mL) cultured in the 6-well plate. (C) Statistics of the quantities of cells colonies.

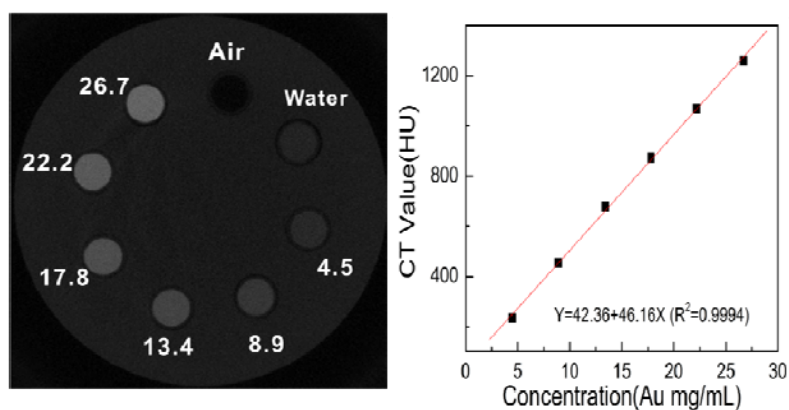

**Fig. S8** (A) CT images of compound meglumine diatrizoate injection suspended in water. The concentration (mg/mL) of each sample was provided beside the respective images. (B) CT hounsfield unit (HU) plotted against various concentrations of compound meglumine diatrizoate injection in the range from 4.5 to 26.7 mg/mL.
